# Supplementary material for: Intermediates involved in the reduction of SO2: insight into the mechanism of sulfite reductases
Source: Royal Society of Chemistry journal article supplement (doi:10.1039/d4cc02124j), 2024-01-01
Supplement: d4cc02124j1.pdf [file d4cc02124j1.pdf]

## Supporting Information

### **Intermediates involved in the Reduction of SO<sub>2</sub>: Insight into the mechanism of Sulfite Reductases**

Aishik Bhattacharya, Soumya Samanta, Arnab Kumar Nath, Arnab Ghatak, Somdatta Ghosh Dey\*,  
Abhishek Dey\*

#### Table of contents

**1. Experimental Procedures**

**2-3**

**2. Results and Discussions**

**3-9**

**3. References**

**9**

## Experimental Procedures

### 1. Materials:

All the reagents used were of the best commercially available quality. H<sub>2</sub>SO<sub>4</sub> (98%, Merck), Na<sub>2</sub>SO<sub>3</sub> (anhydrous, Merck), Silica (Merck), Na<sub>2</sub>SO<sub>4</sub> (Merck), CD<sub>3</sub>OD (Merck), all were bought from respective vendors and used without further purification. Benzaldehyde (Spectrochem), Pyrrole (Spectrochem), Glacial Acetic acid (Spectrochem), Na<sub>2</sub>S (Spectrochem) were bought from respective vendors. 2,4,6-Trimethylpyridine (Sigma-Aldrich), Ferrous Bromide (anhydrous, Sigma-Aldrich), HCl (37%, Merck), were used for Fe<sup>III</sup>TPP synthesis. Na<sub>2</sub><sup>34</sup>SO<sub>3</sub> isotope was bought from Icon Isotopes and used for <sup>34</sup>SO<sub>2</sub> generation. Tetrahydrofuran, Methanol, Hexane were sourced from Finar Chemicals and used only after subjecting them to adequate drying and distilling procedures. Dry and pure SO<sub>2</sub> gas was passed through a solution of conc. H<sub>2</sub>SO<sub>4</sub> to remove any moisture and tested using GC-MS prior to use. The solubility of SO<sub>2</sub> in THF (after 20 mins purging) is assumed to be 0.3-0.5 M as is the case for commercial sources of the same (<https://www.sigmaaldrich.com/catalog/product/aldrich/901592>). All solvents used were dried and degassed before use. Absorption spectra were obtained by a UV-Vis diode array spectrophotometer (Agilent 8453). EPR experiments were performed at 77 K in a liquid nitrogen finger Dewar. EPR spectra were obtained by a JEOL FA200 spectrophotometer with the following parameters- modulation width: 10 gauss; amplitude: 20; time constant: 300 ms; power: 2 mW; frequency: 9.25 GHz. Resonance Raman (rR) data were collected using 413.1 nm excitation from a Kr<sup>+</sup> ion source (Sabre Coherent Inc.) and a Trivista 555 triple spectrophotometer (gratings used in the three stages were 900, 900, and 2400 grooves/mm) fit with an electronically cooled Pixis CCD camera (Princeton Instruments). The irradiation power kept at the sample is 8-10 mW, so that photodegradation does not take place. All the data were collected at 77 K in a liquid N<sub>2</sub> cooled finger Dewar after preparing the reaction mixtures at their respective reaction temperature and freezing them after a stipulated time.

### 2. Methods:

#### 2 a) Synthesis:

Synthesis of Tetraphenylporphyrin (TPP):

Freshly distilled pyrrole (56 ml, 0.8 mol) and 80 ml (0.8 mol) of reagent grade benzaldehyde are added to 3 lit. of refluxing reagent grade propionic acid. (Note: crystalline material is not directly obtained if acetic acid is used.) After refluxing for 30 min, the solution is cooled to room temperature and filtered, and the filter cake is washed thoroughly with methanol. After a hot water wash, the resulting purple crystals are air dried, and finally dried in vacuo to remove adsorbed acid to yield 25 g (20%, yield) of TPP. Spectrophotometric analysis shows that only 1% of the TPP yield remains in the filtrate and also that the filtered material is about 3% tetraphenylporphyrin (TPP) by weight. This method was developed by Adler *et al.*<sup>1</sup>

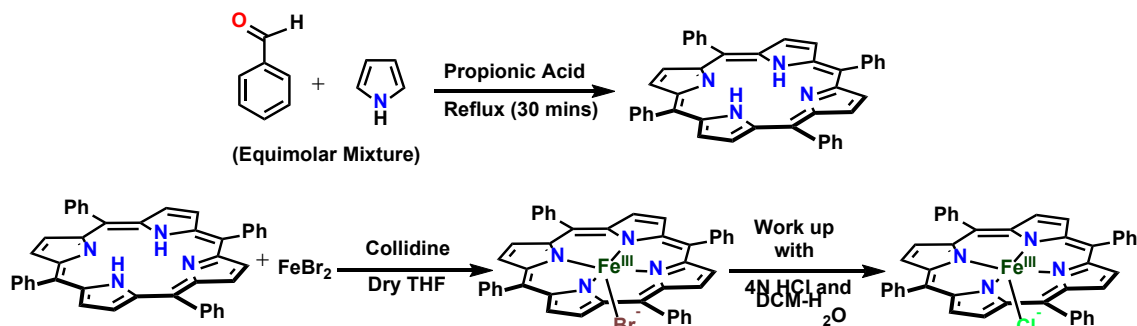

*al.*<sup>1</sup>

**Scheme 1.** Synthesis of TPP and Fe<sup>III</sup>TPP by the reported procedure of Adler *et al.*<sup>1</sup>

#### Synthesis of Fe<sup>III</sup>TPP:

The synthesized 100mg, 0.162 mmol TPP was dissolved in dry degassed THF solvent inside a glove box and then stirred with 98.6 mg, 0.810 mmol 2,4,6-trimethyl pyridine (Collidine) for 30 minutes for the purpose of deprotonation of the pyrrolic protons. Then 350 mg, 1.62 mmol FeBr<sub>2</sub> metallic salt was added into the solution and left under stirring condition and the reaction was followed by TLC until disappearance of the TPP spot and appearance of a new spot. The reaction mixture was taken out of the glove box, the THF was removed from the reaction mixture *in vacuo* and the reaction was worked up with DCM and water after treating with 4N HCl to remove excess FeBr<sub>2</sub>. The organic layer was dried with Na<sub>2</sub>SO<sub>4</sub> and evaporated through a rotary evaporator. The solid compound was purified by column chromatography using 5:95 MeOH-DCM solution to afford the Fe<sup>III</sup>TPP-Cl (HCl being the source of Cl<sup>-</sup> in the resulting compound) (Scheme 1).

#### 2 b) Generation of <sup>34</sup>SO<sub>2</sub> for isotopic shift studies:

80 mg of Na<sub>2</sub><sup>34</sup>SO<sub>3</sub> (Icon Isotopes) was taken in an anaerobic vial and sparged with N<sub>2</sub> to remove traces of Oxygen. In another anaerobic vial H<sub>3</sub>PO<sub>4</sub> was taken and purged with N<sub>2</sub> to ensure removal of traces of Oxygen. In the vial containing Na<sub>2</sub><sup>34</sup>SO<sub>3</sub>, the H<sub>3</sub>PO<sub>4</sub> was added to generate <sup>34</sup>SO<sub>2</sub> and it was bubbled into another vial containing dry degassed THF, to generate <sup>34</sup>SO<sub>2</sub> bubbled THF solution. That solution was injected into Fe<sup>II</sup>TPP solution and subjected to different spectroscopic techniques like resonance Raman and EPR.

#### 2 c) Sample Preparation for EPR and Raman Spectroscopy:

Fe<sup>III</sup>TPP was reduced to Fe<sup>II</sup>TPP inside the glovebox using 0.5eq. Na<sub>2</sub>S dissolved in dry degassed MeOH and/or CD<sub>3</sub>OD<sup>2</sup>. XylH<sup>+</sup>Cl<sup>-</sup> was dissolved in dry degassed MeOH to prepare its 10mM stock solution. In EPR Tubes, 20 μL, 5 mM solution of Fe<sup>II</sup>TPP were taken, in presence or absence of XylH<sup>+</sup>Cl<sup>-</sup> and maintained at different temperatures like -40<sup>o</sup>C, -80<sup>o</sup>C, RT. Then they were injected with an 80 μL saturated solution of dry and pure SO<sub>2</sub> gas in THF (or <sup>34</sup>SO<sub>2</sub> bubbled THF) to afford a 100 μL solution of 1 mM concentration reaction mixture. The reaction mixtures were allowed to progress for required time before freezing them in liq. N<sub>2</sub> for EPR analysis and resonance Raman analysis.

#### 2 d) DFT Calculations:

The density functional calculations are performed using Gaussian 16 G16, B3LYP, 6-311g\*) software package. Geometry optimisation was done with the B3LYP functional with an unrestricted formalism. For MeOH bound SO complex a mixed basis set with 6-311g\* on Fe and 6-31g\* on C, H, N, S, O have been used for optimization and frequency calculations.<sup>3</sup> Tight SCF convergence and the 6-311+g\* basis set has been used on all the atoms for a single point energy calculation using the PCM model and convergence criterion of 10<sup>-10</sup> Hartree.<sup>4</sup> Mulliken orbital populations are calculated using QMForge, and molecular orbital contours are generated using Gaussview software. The ground state wave function of Fe<sup>III</sup>-LS-SO<sub>2</sub><sup>-</sup> complexes have been calculated using the contribution of Fe and S, O in the unoccupied molecular orbitals.

## Results and Discussion

### 3. Figures:

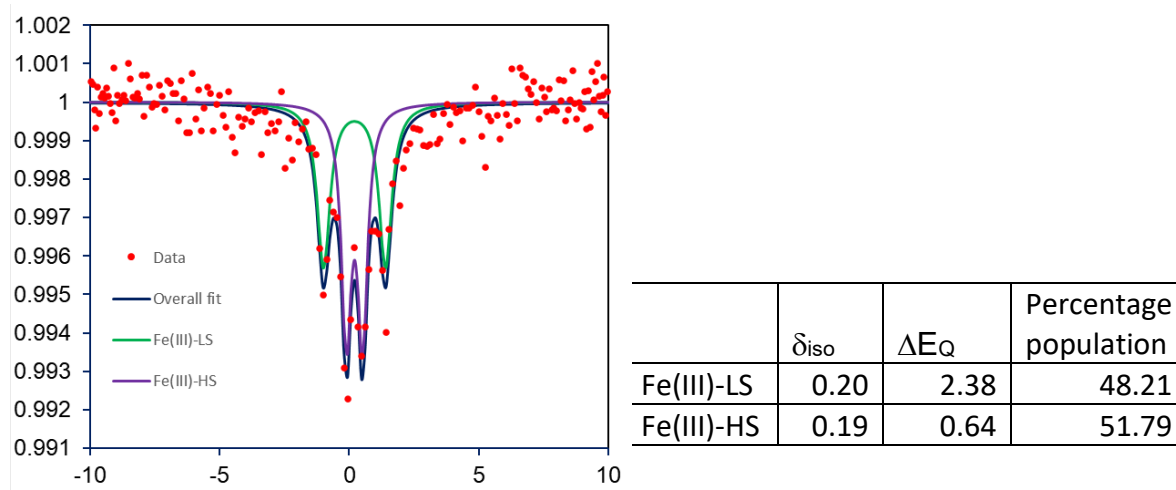

**Fig. S1.** Mössbauer data of Int-I collected at 90K using  $^{55}\text{Fe}$  enriched samples. The spectra can be fitted with a HS Fe(III) and a LS Fe(III) component having almost equal population.

| Table 1: Experimental and theoretically calculated vibrations of the Fe-S-O unit |          |                                             |                                                        |         |                                            |                |
|----------------------------------------------------------------------------------|----------|---------------------------------------------|--------------------------------------------------------|---------|--------------------------------------------|----------------|
| Species                                                                          | Fe-S (Å) | Fe-S ( <sup>34</sup> S) (cm <sup>-1</sup> ) |                                                        | S-O (Å) | S-O ( <sup>34</sup> S) (cm <sup>-1</sup> ) |                |
|                                                                                  |          | Expt.                                       | Theo.                                                  |         | Expt.                                      | Theo.          |
| Fe <sup>3+</sup> -SO <sub>2</sub> <sup>2-</sup> (Int-1)                          | 2.33     | 340<br>(337)                                | 339<br>(337)                                           | 1.50    | 984<br>(970)                               | 994<br>(987)   |
| Fe <sup>3+</sup> -SO (Int-2)                                                     | 2.24     | 206<br>(204)<br>382<br>(377)                | 215 <sup>s</sup><br>(214)<br>349 <sup>b</sup><br>(347) | 1.52    | 1014<br>(1005)                             | 1053<br>(1044) |
| s. Fe-SO stretch b. Fe-S-O bend                                                  |          |                                             |                                                        |         |                                            |                |

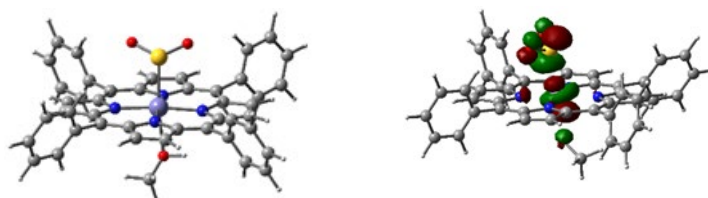

**Figure S2.** (left) DFT optimized structure of [Fe(III)TPP-SO<sub>2</sub>]<sup>-</sup> species being proposed as Int-I, (right) contour of the anti-bonding d<sub>z<sup>2</sup></sub> orbital showing interaction with the SO<sub>2</sub><sup>2-</sup> ligand.

#### 4. DFT Coordinates:

##### MeOH-LS-Fe<sup>III</sup>-<sup>32</sup>S<sup>32</sup>O<sub>2</sub><sup>2-</sup>-TPP

|    |            |            |            |
|----|------------|------------|------------|
| Fe | 3.32396500 | 9.29041700 | 6.74064600 |
| N  | 5.13932300 | 9.32432200 | 5.85541800 |
| N  | 2.46630600 | 9.14491200 | 4.91381300 |
| N  | 1.51050500 | 9.46017100 | 7.56611600 |
| N  | 4.18566100 | 9.55761100 | 8.52554500 |
| C  | 6.55726100 | 9.36024700 | 7.87682900 |
| C  | 4.48646500 | 9.12009600 | 3.47742000 |
| C  | 3.10069300 | 9.09046200 | 3.68789600 |
| C  | 1.11542400 | 9.11748400 | 4.62909200 |
| C  | 6.85957000 | 9.14494800 | 4.30636700 |
| C  | 7.43394600 | 9.19221500 | 5.53740600 |
| C  | 6.36242600 | 9.30296500 | 6.49526900 |

|   |             |             |             |
|---|-------------|-------------|-------------|
| C | 5.43078900  | 9.21709200  | 4.50888700  |
| C | 0.90136800  | 9.05213500  | 3.20241100  |
| C | 2.12896900  | 9.04128700  | 2.61965200  |
| C | 2.17001400  | 9.66860400  | 9.93739100  |
| C | 3.55340500  | 9.66288700  | 9.74118600  |
| C | 1.22902300  | 9.58733000  | 8.90720000  |
| C | 0.07901600  | 9.21623800  | 5.56626900  |
| C | 4.52269200  | 9.71572100  | 10.81345600 |
| C | 5.52857400  | 9.50553500  | 8.81186500  |
| C | 5.74765100  | 9.61606800  | 10.23702000 |
| C | -0.78551900 | 9.48069900  | 7.91151800  |
| C | -0.19856700 | 9.61123100  | 9.12824700  |
| C | 0.28469600  | 9.38766300  | 6.94170500  |
| H | 7.34911300  | 9.04519900  | 3.34827800  |
| H | 8.48536100  | 9.14875300  | 5.78437200  |
| H | -0.06369500 | 9.04081200  | 2.71632000  |
| H | 2.36189700  | 9.01703300  | 1.56477600  |
| H | 4.28359600  | 9.80325600  | 11.86380000 |
| H | 6.71529100  | 9.61132900  | 10.71867200 |
| H | -1.84062300 | 9.43886700  | 7.68272100  |
| H | -0.67690400 | 9.70746400  | 10.09262200 |
| C | 7.94782800  | 9.15506400  | 8.39705700  |
| C | 8.86070100  | 10.20941400 | 8.53487100  |
| C | 8.35067900  | 7.85906400  | 8.75794700  |
| C | 10.14957000 | 9.97738300  | 9.02316800  |
| H | 8.55405400  | 11.21503700 | 8.25853100  |
| C | 9.63759300  | 7.62749200  | 9.24604300  |
| H | 7.63654900  | 7.04783200  | 8.64307200  |
| C | 10.54101000 | 8.68561500  | 9.38037400  |
| H | 10.84624800 | 10.80664400 | 9.12552700  |
| H | 9.93599500  | 6.61837400  | 9.52088800  |
| H | 11.54374900 | 8.50422000  | 9.76098700  |
| C | -1.32957400 | 9.14124200  | 5.06396500  |
| C | -2.17441200 | 10.26292800 | 5.09774400  |
| C | -1.84313700 | 7.94331400  | 4.53993700  |
| C | -3.48647000 | 10.19130200 | 4.62623600  |
| H | -1.79004700 | 11.19724500 | 5.49756100  |
| C | -3.15390900 | 7.86925400  | 4.06543200  |
| C | -3.98187500 | 8.99329200  | 4.10680000  |
| H | -4.12058800 | 11.07444100 | 4.66068200  |
| H | -3.53022900 | 6.92923300  | 3.66832600  |
| H | -5.00359100 | 8.93599600  | 3.73866000  |
| C | 1.66276400  | 9.67615100  | 11.34747600 |
| C | 1.26101000  | 8.46919100  | 11.94210100 |
| C | 1.58171700  | 10.85662200 | 12.09953100 |
| C | 0.78691100  | 8.44689600  | 13.25474600 |
| H | 1.33689200  | 7.55554500  | 11.35880000 |
| C | 1.10779600  | 10.83488000 | 13.41383000 |
| H | 1.89214400  | 11.79417200 | 11.64571400 |
| C | 0.70797000  | 9.62975400  | 13.99486800 |
| H | 0.48226500  | 7.50324700  | 13.70155800 |
| H | 1.04982800  | 11.76044200 | 13.98253400 |
| H | 0.33894600  | 9.61187100  | 15.01794000 |
| C | 4.98941300  | 9.02369200  | 2.07079100  |
| C | 4.82269800  | 7.84612700  | 1.32262400  |
| C | 5.64454400  | 10.10560900 | 1.45945700  |
| C | 5.29016700  | 7.75466900  | 0.01056500  |
| H | 4.32618400  | 6.99818300  | 1.78548000  |
| C | 6.11563400  | 10.01647000 | 0.14834500  |
| H | 5.78039300  | 11.02379900 | 2.02440800  |
| C | 5.93912300  | 8.83985900  | -0.58286000 |
| H | 5.15276100  | 6.83064200  | -0.54641800 |

|   |             |             |             |
|---|-------------|-------------|-------------|
| H | 6.61707100  | 10.86948500 | -0.30347300 |
| H | 6.30493300  | 8.76874400  | -1.60451600 |
| H | -1.20271900 | 7.06633300  | 4.51438400  |
| S | 3.47129200  | 7.02963700  | 7.27299800  |
| O | 4.90754100  | 6.59399700  | 7.40984400  |
| O | 3.51634900  | 11.61537700 | 6.42500500  |
| H | 4.32100800  | 11.45987400 | 5.90315100  |
| C | 2.56910000  | 12.32571700 | 5.63660600  |
| H | 1.63121500  | 12.31912700 | 6.19583800  |
| H | 2.88281600  | 13.36927700 | 5.48132900  |
| H | 2.39744900  | 11.84732100 | 4.66538400  |
| O | 2.58073800  | 6.67009000  | 8.43272300  |

**MeOH-LS-Fe<sup>III</sup>-<sup>34</sup>SO<sub>2</sub><sup>2-</sup>-TPP**

|    |             |             |             |
|----|-------------|-------------|-------------|
| Fe | 3.32396500  | 9.29041700  | 6.74064600  |
| N  | 5.13932300  | 9.32432200  | 5.85541800  |
| N  | 2.46630600  | 9.14491200  | 4.91381300  |
| N  | 1.51050500  | 9.46017100  | 7.56611600  |
| N  | 4.18566100  | 9.55761100  | 8.52554500  |
| C  | 6.55726100  | 9.36024700  | 7.87682900  |
| C  | 4.48646500  | 9.12009600  | 3.47742000  |
| C  | 3.10069300  | 9.09046200  | 3.68789600  |
| C  | 1.11542400  | 9.11748400  | 4.62909200  |
| C  | 6.85957000  | 9.14494800  | 4.30636700  |
| C  | 7.43394600  | 9.19221500  | 5.53740600  |
| C  | 6.36242600  | 9.30296500  | 6.49526900  |
| C  | 5.43078900  | 9.21709200  | 4.50888700  |
| C  | 0.90136800  | 9.05213500  | 3.20241100  |
| C  | 2.12896900  | 9.04128700  | 2.61965200  |
| C  | 2.17001400  | 9.66860400  | 9.93739100  |
| C  | 3.55340500  | 9.66288700  | 9.74118600  |
| C  | 1.22902300  | 9.58733000  | 8.90720000  |
| C  | 0.07901600  | 9.21623800  | 5.56626900  |
| C  | 4.52269200  | 9.71572100  | 10.81345600 |
| C  | 5.52857400  | 9.50553500  | 8.81186500  |
| C  | 5.74765100  | 9.61606800  | 10.23702000 |
| C  | -0.78551900 | 9.48069900  | 7.91151800  |
| C  | -0.19856700 | 9.61123100  | 9.12824700  |
| C  | 0.28469600  | 9.38766300  | 6.94170500  |
| H  | 7.34911300  | 9.04519900  | 3.34827800  |
| H  | 8.48536100  | 9.14875300  | 5.78437200  |
| H  | -0.06369500 | 9.04081200  | 2.71632000  |
| H  | 2.36189700  | 9.01703300  | 1.56477600  |
| H  | 4.28359600  | 9.80325600  | 11.86380000 |
| H  | 6.71529100  | 9.61132900  | 10.71867200 |
| H  | -1.84062300 | 9.43886700  | 7.68272100  |
| H  | -0.67690400 | 9.70746400  | 10.09262200 |
| C  | 7.94782800  | 9.15506400  | 8.39705700  |
| C  | 8.86070100  | 10.20941400 | 8.53487100  |
| C  | 8.35067900  | 7.85906400  | 8.75794700  |
| C  | 10.14957000 | 9.97738300  | 9.02316800  |
| H  | 8.55405400  | 11.21503700 | 8.25853100  |
| C  | 9.63759300  | 7.62749200  | 9.24604300  |
| H  | 7.63654900  | 7.04783200  | 8.64307200  |
| C  | 10.54101000 | 8.68561500  | 9.38037400  |
| H  | 10.84624800 | 10.80664400 | 9.12552700  |
| H  | 9.93599500  | 6.61837400  | 9.52088800  |
| H  | 11.54374900 | 8.50422000  | 9.76098700  |
| C  | -1.32957400 | 9.14124200  | 5.06396500  |
| C  | -2.17441200 | 10.26292800 | 5.09774400  |
| C  | -1.84313700 | 7.94331400  | 4.53993700  |
| C  | -3.48647000 | 10.19130200 | 4.62623600  |

|           |             |             |             |
|-----------|-------------|-------------|-------------|
| H         | -1.79004700 | 11.19724500 | 5.49756100  |
| C         | -3.15390900 | 7.86925400  | 4.06543200  |
| C         | -3.98187500 | 8.99329200  | 4.10680000  |
| H         | -4.12058800 | 11.07444100 | 4.66068200  |
| H         | -3.53022900 | 6.92923300  | 3.66832600  |
| H         | -5.00359100 | 8.93599600  | 3.73866000  |
| C         | 1.66276400  | 9.67615100  | 11.34747600 |
| C         | 1.26101000  | 8.46919100  | 11.94210100 |
| C         | 1.58171700  | 10.85662200 | 12.09953100 |
| C         | 0.78691100  | 8.44689600  | 13.25474600 |
| H         | 1.33689200  | 7.55554500  | 11.35880000 |
| C         | 1.10779600  | 10.83488000 | 13.41383000 |
| H         | 1.89214400  | 11.79417200 | 11.64571400 |
| C         | 0.70797000  | 9.62975400  | 13.99486800 |
| H         | 0.48226500  | 7.50324700  | 13.70155800 |
| H         | 1.04982800  | 11.76044200 | 13.98253400 |
| H         | 0.33894600  | 9.61187100  | 15.01794000 |
| C         | 4.98941300  | 9.02369200  | 2.07079100  |
| C         | 4.82269800  | 7.84612700  | 1.32262400  |
| C         | 5.64454400  | 10.10560900 | 1.45945700  |
| C         | 5.29016700  | 7.75466900  | 0.01056500  |
| H         | 4.32618400  | 6.99818300  | 1.78548000  |
| C         | 6.11563400  | 10.01647000 | 0.14834500  |
| H         | 5.78039300  | 11.02379900 | 2.02440800  |
| C         | 5.93912300  | 8.83985900  | -0.58286000 |
| H         | 5.15276100  | 6.83064200  | -0.54641800 |
| H         | 6.61707100  | 10.86948500 | -0.30347300 |
| H         | 6.30493300  | 8.76874400  | -1.60451600 |
| H         | -1.20271900 | 7.06633300  | 4.51438400  |
| S(Iso=34) | 3.47129200  | 7.02963700  | 7.27299800  |
| O         | 4.90754100  | 6.59399700  | 7.40984400  |
| O         | 3.51634900  | 11.61537700 | 6.42500500  |
| H         | 4.32100800  | 11.45987400 | 5.90315100  |
| C         | 2.56910000  | 12.32571700 | 5.63660600  |
| H         | 1.63121500  | 12.31912700 | 6.19583800  |
| H         | 2.88281600  | 13.36927700 | 5.48132900  |
| H         | 2.39744900  | 11.84732100 | 4.66538400  |
| O         | 2.58073800  | 6.67009000  | 8.43272300  |

**MeOH-LS-Fe<sup>III</sup>-<sup>32</sup>SO-TPP**

|    |            |             |             |
|----|------------|-------------|-------------|
| Fe | 3.36147200 | 9.27476200  | 6.73408800  |
| N  | 5.15450600 | 9.24609500  | 5.89696700  |
| N  | 2.50041100 | 9.11337000  | 4.94595000  |
| N  | 1.55139300 | 9.38165100  | 7.56724000  |
| N  | 4.22871400 | 9.50253300  | 8.50414100  |
| C  | 6.53516800 | 8.86414800  | 7.91133100  |
| C  | 4.49694600 | 9.46586300  | 3.51811800  |
| C  | 3.11107000 | 9.29897300  | 3.72277000  |
| C  | 1.17278600 | 8.87304800  | 4.67050600  |
| C  | 6.85882000 | 9.20106400  | 4.33970400  |
| C  | 7.41492100 | 8.93050100  | 5.55446500  |
| C  | 6.34901300 | 8.96876900  | 6.51693300  |
| C  | 5.44556900 | 9.36967600  | 4.55404300  |
| C  | 0.94178300 | 8.91706600  | 3.25288300  |
| C  | 2.13540500 | 9.21882100  | 2.66849900  |
| C  | 2.22459900 | 10.03217300 | 9.86186000  |
| C  | 3.60733800 | 9.84158700  | 9.68451700  |
| C  | 1.26884000 | 9.74426900  | 8.86482800  |
| C  | 0.14359400 | 8.76602000  | 5.62976200  |
| C  | 4.54614800 | 9.77088800  | 10.77532300 |
| C  | 5.52909200 | 9.19977000  | 8.83679300  |
| C  | 5.72584200 | 9.33313600  | 10.25509000 |



|   |             |             |             |
|---|-------------|-------------|-------------|
| C | -0.72216600 | 9.21756800  | 7.95346800  |
| C | -0.15071200 | 9.68831100  | 9.09651100  |
| C | 0.33500500  | 9.07249900  | 6.98982400  |
| H | 7.35193600  | 9.24752200  | 3.38052000  |
| H | 8.45291400  | 8.74179400  | 5.78336100  |
| H | -0.01646300 | 8.78372200  | 2.77405500  |
| H | 2.33622800  | 9.37058700  | 1.61909000  |
| H | 4.31236200  | 9.97381000  | 11.80948700 |
| H | 6.64388500  | 9.11995400  | 10.78083300 |
| H | -1.76596800 | 9.01234600  | 7.77255200  |
| H | -0.64314400 | 9.94984900  | 10.02033600 |
| C | 7.87190500  | 8.43557800  | 8.40379400  |
| C | 8.70393300  | 9.30003300  | 9.13497800  |
| C | 8.31558600  | 7.13193500  | 8.12004000  |
| C | 9.95629700  | 8.86820900  | 9.57126100  |
| H | 8.37907000  | 10.31627700 | 9.33953600  |
| C | 9.56189100  | 6.70108700  | 8.57335700  |
| H | 7.66498600  | 6.45735100  | 7.57169500  |
| C | 10.38563300 | 7.56771200  | 9.29579000  |
| H | 10.59753100 | 9.54914000  | 10.12341000 |
| H | 9.88811100  | 5.68667200  | 8.36325000  |
| H | 11.35867000 | 7.23176300  | 9.64207300  |
| C | -1.21633900 | 8.39526200  | 5.14572400  |
| C | -2.29629600 | 9.29118200  | 5.22762100  |
| C | -1.42565100 | 7.12841800  | 4.57337400  |
| C | -3.55567300 | 8.92447600  | 4.75391400  |
| H | -2.14170300 | 10.28363100 | 5.64090700  |
| C | -2.69019600 | 6.76012000  | 4.11511500  |
| C | -3.75727900 | 7.65696800  | 4.20261300  |
| H | -4.37822000 | 9.63139100  | 4.81175900  |
| H | -2.84078100 | 5.77221000  | 3.68980600  |
| H | -4.74019000 | 7.37123400  | 3.83975800  |
| C | 1.75753600  | 10.47236500 | 11.20825500 |
| C | 0.98800900  | 9.63102600  | 12.02997600 |
| C | 2.11296300  | 11.74673800 | 11.68212600 |
| C | 0.57882800  | 10.05978900 | 13.29248900 |
| H | 0.73331800  | 8.63216300  | 11.68790200 |
| C | 1.68918000  | 12.17725900 | 12.93928900 |
| H | 2.70924700  | 12.40360200 | 11.05515100 |
| C | 0.92258800  | 11.33498500 | 13.74754500 |
| H | -0.00395500 | 9.39435100  | 13.92271800 |
| H | 1.95951900  | 13.17002900 | 13.28717100 |
| H | 0.59867000  | 11.66841300 | 14.72905500 |
| C | 5.00482500  | 9.66658000  | 2.13108300  |
| C | 4.82104300  | 8.68966600  | 1.13707200  |
| C | 5.70197100  | 10.84296700 | 1.80530000  |
| C | 5.31790400  | 8.88966800  | -0.15049800 |
| H | 4.31050000  | 7.76331600  | 1.38314600  |
| C | 6.18436300  | 11.04610700 | 0.51273800  |
| H | 5.85179600  | 11.60482400 | 2.56519600  |
| C | 5.99484500  | 10.06968300 | -0.46770300 |
| H | 5.18058600  | 8.12012600  | -0.90450700 |
| H | 6.70889100  | 11.96633200 | 0.27254300  |
| H | 6.37655200  | 10.22535400 | -1.47242300 |
| H | -0.59845800 | 6.42757900  | 4.50688800  |
| S | 3.34087900  | 7.04659200  | 6.95846700  |
| O | 4.69072200  | 6.51682100  | 7.42893700  |
| O | 3.39432200  | 11.42902900 | 6.55559200  |
| H | 4.30557400  | 11.73443800 | 6.42471500  |
| C | 2.48781800  | 12.26533300 | 5.81661100  |
| H | 1.48411300  | 11.91114200 | 6.04920000  |
| H | 2.58946000  | 13.30569600 | 6.14128500  |

H 2.66091800 12.18838500 4.73797200

**MeOH-LS-Fe<sup>III</sup>-<sup>34</sup>SO-TPP**

|    |             |             |             |
|----|-------------|-------------|-------------|
| Fe | 3.36137500  | 9.27499900  | 6.73412900  |
| N  | 5.15442500  | 9.24634200  | 5.89699600  |
| N  | 2.50035100  | 9.11372200  | 4.94593900  |
| N  | 1.55132100  | 9.38153700  | 7.56727600  |
| N  | 4.22861700  | 9.50266800  | 8.50418600  |
| C  | 6.53508800  | 8.86441300  | 7.91135900  |
| C  | 4.49690800  | 9.46620800  | 3.51814000  |
| C  | 3.11098800  | 9.29953000  | 3.72280300  |
| C  | 1.17271500  | 8.87346900  | 4.67045800  |
| C  | 6.85873700  | 9.20125000  | 4.33972800  |
| C  | 7.41482900  | 8.93074400  | 5.55448900  |
| C  | 6.34892800  | 8.96907100  | 6.51695000  |
| C  | 5.44550000  | 9.36992000  | 4.55405300  |
| C  | 0.94167400  | 8.91783800  | 3.25285000  |
| C  | 2.13531300  | 9.21955800  | 2.66851300  |
| C  | 2.22444700  | 10.03192600 | 9.86196500  |
| C  | 3.60723800  | 9.84159500  | 9.68457100  |
| C  | 1.26872800  | 9.74382500  | 8.86497400  |
| C  | 0.14358700  | 8.76601000  | 5.62969900  |
| C  | 4.54607200  | 9.77103600  | 10.77535500 |
| C  | 5.52903800  | 9.20001300  | 8.83682300  |
| C  | 5.72579600  | 9.33339900  | 10.25511500 |
| C  | -0.72213800 | 9.21667200  | 7.95359500  |
| C  | -0.15079300 | 9.68744000  | 9.09667700  |
| C  | 0.33501400  | 9.07212800  | 6.98986900  |
| H  | 7.35184000  | 9.24761400  | 3.38053400  |
| H  | 8.45280900  | 8.74198900  | 5.78339500  |
| H  | -0.01658700 | 8.78464500  | 2.77401200  |
| H  | 2.33614000  | 9.37145400  | 1.61912600  |
| H  | 4.31228100  | 9.97393700  | 11.80952000 |
| H  | 6.64386200  | 9.12030900  | 10.78085700 |
| H  | -1.76588100 | 9.01114900  | 7.77270300  |
| H  | -0.64328300 | 9.94869300  | 10.02055000 |
| C  | 7.87184800  | 8.43586700  | 8.40378200  |
| C  | 8.70378600  | 9.30023800  | 9.13517100  |
| C  | 8.31562100  | 7.13230700  | 8.11980200  |
| C  | 9.95616300  | 8.86841600  | 9.57141900  |
| H  | 8.37884100  | 10.31641700 | 9.33992000  |
| C  | 9.56194100  | 6.70146100  | 8.57307500  |
| H  | 7.66507600  | 6.45778000  | 7.57132400  |
| C  | 10.38559800 | 7.56800300  | 9.29570500  |
| H  | 10.59732500 | 9.54927800  | 10.12373700 |
| H  | 9.88824200  | 5.68711100  | 8.36277900  |
| H  | 11.35864300 | 7.23204900  | 9.64196100  |
| C  | -1.21628600 | 8.39514600  | 5.14557500  |
| C  | -2.29643900 | 9.29080800  | 5.22780400  |
| C  | -1.42532100 | 7.12849200  | 4.57270300  |
| C  | -3.55573300 | 8.92401200  | 4.75395100  |
| H  | -2.14205600 | 10.28313700 | 5.64145300  |
| C  | -2.68978800 | 6.76008800  | 4.11431900  |
| C  | -3.75706400 | 7.65666800  | 4.20216600  |
| H  | -4.37843400 | 9.63072700  | 4.81205900  |
| H  | -2.84015700 | 5.77230800  | 3.68863000  |
| H  | -4.73991200 | 7.37086200  | 3.83919800  |
| C  | 1.75742800  | 10.47221800 | 11.20835000 |
| C  | 0.98812500  | 9.63087900  | 12.03029200 |
| C  | 2.11269600  | 11.74672100 | 11.68198300 |
| C  | 0.57898300  | 10.05978500 | 13.29277000 |
| H  | 0.73363000  | 8.63189300  | 11.68844400 |

|           |             |             |             |
|-----------|-------------|-------------|-------------|
| C         | 1.68893800  | 12.17738500 | 12.93910300 |
| H         | 2.70881500  | 12.40358700 | 11.05485300 |
| C         | 0.92255500  | 11.33512200 | 13.74756800 |
| H         | -0.00361100 | 9.39435000  | 13.92317700 |
| H         | 1.95914100  | 13.17025900 | 13.28679500 |
| H         | 0.59867100  | 11.66866800 | 14.72904900 |
| C         | 5.00483400  | 9.66655800  | 2.13106600  |
| C         | 4.82089800  | 8.68944900  | 1.13727600  |
| C         | 5.70227700  | 10.84270500 | 1.80504300  |
| C         | 5.31788200  | 8.88902600  | -0.15031100 |
| H         | 4.31014300  | 7.76326500  | 1.38353800  |
| C         | 6.18478000  | 11.04543100 | 0.51245500  |
| H         | 5.85223100  | 11.60470800 | 2.56476500  |
| C         | 5.99510300  | 10.06881300 | -0.46776100 |
| H         | 5.18043600  | 8.11933300  | -0.90414300 |
| H         | 6.70952800  | 11.96548000 | 0.27206600  |
| H         | 6.37690800  | 10.22415100 | -1.47249500 |
| H         | -0.59797600 | 6.42786000  | 4.50593600  |
| S(Iso=34) | 3.34076400  | 7.04687600  | 6.95860100  |
| O         | 4.69085300  | 6.51717000  | 7.42839600  |
| O         | 3.39430700  | 11.42904900 | 6.55590200  |
| H         | 4.30560800  | 11.73419600 | 6.42476300  |
| C         | 2.48782000  | 12.26562700 | 5.81721000  |
| H         | 1.48409700  | 11.91149200 | 6.04981400  |
| H         | 2.58962100  | 13.30589500 | 6.14212900  |
| H         | 2.66080100  | 12.18892700 | 4.73853600  |

## References

- 1 A. D. Adler, F. R. Longo, J. D. Finarelli, J. Goldmacher, J. Assour and L. Korsakoff, *J. Org. Chem.*, 1967, **32**, 476.
- 2 K. Mittra, A. Singha and A. Dey, *Inorg. Chem.*, 2017, **56**, 3916–3925.
- 3 J. P. Perdew, *Phys. Rev. B*, 1986, **34**, 7406.
- 4 M. Pecul, D. Marchesan, K. Ruud and S. Coriani, *J. Chem. Phys.*, 2004, **122**, 24106.
